# Supplementary material for: Comparative analysis of plant carbohydrate active enZymes and their role in xylogenesis
Source: PubMed Central journal article supplement (PMC4440533; doi:10.1186/s12864-015-1571-8), 2015-05-22
Supplement: 12864_2015_1571_MOESM1_ESM.pdf [file 12864_2015_1571_MOESM1_ESM.pdf]

**Table S1** Relative standard deviation (RSD) (absolute co-efficient of variation) between plant species.

|                                           | GH      | GT      | PL      | CE      | CBM      |
|-------------------------------------------|---------|---------|---------|---------|----------|
|                                           | RSD%    | RSD%    | RSD%    | RSD%    | RSD%     |
| <b>Group 1: Green algae</b>               | 4.88207 | 5.28067 | 9.79540 | 3.25097 | 15.17131 |
|                                           | 335     | 996     | 98      | 246     | 14       |
| <b>Group 2: Lycophytes and bryophytes</b> | 2.05345 | 0.90480 | 27.1660 | 10.2780 | 2.642406 |
|                                           | 889     | 126     | 388     | 46      | 08       |
| <b>Group 3: Monocots</b>                  | 8.70570 | 6.78586 | 37.6825 | 6.56672 | 13.82906 |
|                                           | 272     | 237     | 923     | 43      | 14       |
| <b>Group 4: Eudicots</b>                  | 5.44328 | 3.75275 | 11.8457 | 4.90940 | 8.403296 |
|                                           | 404     | 016     | 336     | 62      | 11       |
