# Supplementary material for: Comparative analysis of plant carbohydrate active enZymes and their role in xylogenesis
Source: PubMed Central journal article supplement (PMC4440533; doi:10.1186/s12864-015-1571-8), 2015-05-22
Supplement: 12864_2015_1571_MOESM16_ESM.pdf [file 12864_2015_1571_MOESM16_ESM.pdf]

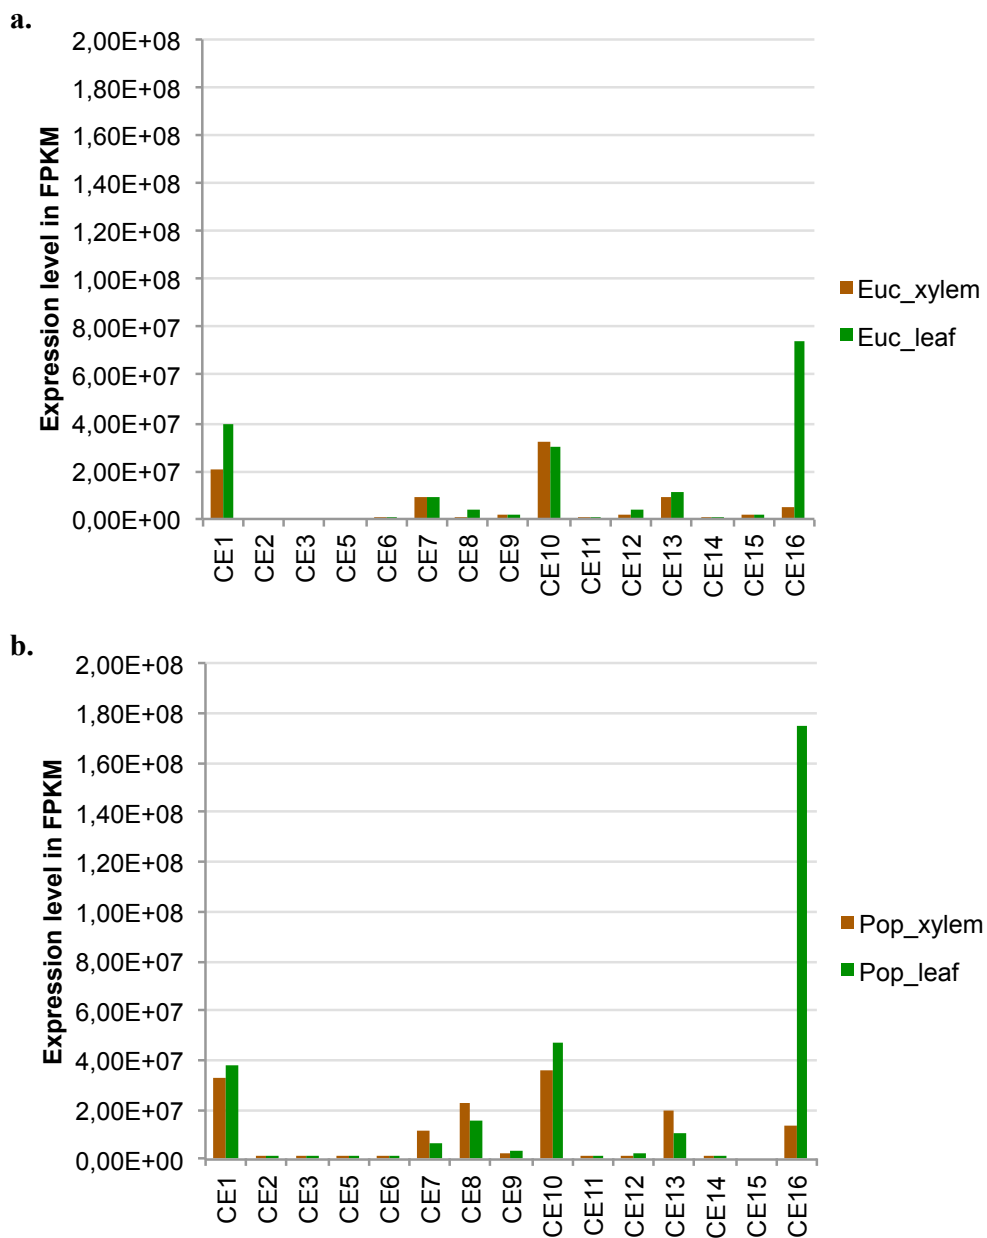

**Figure S10** Comparative expression patterns of CE domain families in *E. grandis* and *P. trichocarpa*.
